1 **Running head:** Prezygotic isolation in *Arabidopsis lyrata*

2 Limited phenological and pollinator-mediated isolation among selfing and outcrossing

3 *Arabidopsis lyrata* populations

4 **Authors:** Courtney E. Gorman<sup>\*1</sup>, Lindsay Bond<sup>2</sup>, Mark van Kleunen<sup>1,3</sup>, Marcel E. Dorken<sup>2</sup>, and  
5 Marc Stift<sup>1</sup>

6 <sup>1</sup> University of Konstanz, Department of Biology, Universitaetsstrasse 10, Konstanz, BW, DE  
7 78464

8 <sup>2</sup> Trent University, Department of Biology, DNA B108.10, Peterborough, ON, CAN K9J 7B8

9 <sup>3</sup> Zhejiang Provincial Key Laboratory of Plant Evolutionary Ecology and Conservation, Taizhou  
10 University, Taizhou 318000, China

11 \* Corresponding author (email: [courtney.gorman@uni-konstanz.de](mailto:courtney.gorman@uni-konstanz.de), ORCID ID:  
12 <https://orcid.org/0000-0001-7310-8803>)

13  
14

15

16

17

18

19

20

21

22

23

24

25

26

27 **Abstract**

28 Transitions from outcrossing to selfing have been a frequent evolutionary shift in plants and  
29 clearly play a role in species divergence. However, many questions remain about the initial  
30 mechanistic basis of reproductive isolation during the evolution of selfing. For instance, how  
31 important are prezygotic pre-pollination mechanisms (e.g. changes in phenology and pollinator  
32 visitation) in maintaining reproductive isolation between newly arisen selfing populations and  
33 their outcrossing ancestors? To test whether changes in phenology and pollinator visitation  
34 isolate selfing populations of *Arabidopsis lyrata* from outcrossing populations, we conducted a  
35 common garden experiment with plants from selfing and outcrossing populations as well as their  
36 F1 hybrids. Specifically, we asked whether there was isolation between outcrossing and selfing  
37 plants and their F1 hybrids through differences in 1) the timing or intensity of flowering; and/or  
38 2) pollinator visitation. We found that phenology largely overlapped between plants from  
39 outcrossing and selfing populations. There were also no differences in pollinator preference  
40 related to mating system. Additionally, pollinators preferred to visit flowers on the same plant  
41 rather than exploring nearby plants, creating a large opportunity for self-fertilization. Overall,  
42 this suggests that prezygotic pre-pollination mechanisms do not strongly reproductively isolate  
43 plants from selfing and outcrossing populations of *Arabidopsis lyrata*.

44  
45 **Key words:** *Arabidopsis lyrata*, mating system, phenology, pre-pollination, prezygotic isolation,  
46 pollinators, reproductive isolation, selfing

47

48

## 49 **Background**

50 Mating-system transitions from obligate outcrossing to predominantly selfing have arisen  
51 repeatedly across almost all major plant lineages [1]. Up to 15% of seed plants are predominantly  
52 selfing and many share a relatively recent common ancestor with outcrossing species [2]. The  
53 transition from outcrossing to selfing is usually associated with convergent evolution of a flower  
54 morphology that optimizes self-pollination and resource use (e.g. smaller flower size and/or a  
55 reduction in pollen, nectar, and scent production), termed the "selfing syndrome" [3–5]. These  
56 types of changes in flowering likely contribute to the reproductive isolation of selfing lineages  
57 [6], but it is unclear if they or their subsequent effects on pollinators are the main drivers of  
58 reproductive isolation in incipient selfing species.

59 Reproductive barriers are essential to the maintenance of evolutionary independence of  
60 parapatric populations (i.e. populations with slightly overlapping ranges). Reproductive isolation  
61 can be partial or complete, and most plant species are isolated by a combination of pre- and  
62 postzygotic barriers [6–8]. In plants, prezygotic mechanisms are generally more important than  
63 postzygotic mechanisms in contributing to the total reproductive isolation of species [6,8–10].  
64 Post-pollination mechanisms such as genetic incompatibilities can cause differences in seed  
65 number and/or seed viability, but pre-pollination mechanisms generally contribute more to the  
66 total reproductive isolation of plant species [6,9,10]. Although rarely addressed, this principle  
67 appears to hold for cases where a shift to self-fertilization has played a part in speciation. For  
68 example, in two closely related *Mimulus* species with a contrasting mating system, differences in  
69 mean flowering date and floral display contributed the most to reproductive isolation compared  
70 to other pre- and post-pollination mechanisms [11]. However, whether the transition to self-

71 fertilization could also promote rapid prezygotic reproductive isolation via changes in floral  
72 morphology and associated shifts in pollinator preferences [7] has rarely been studied.

73 Plant phenological traits and the behaviour of pollinators could readily interact. For  
74 example, pollinator behaviour and the number of flowers should both play a large role in  
75 determining the opportunity for the flowers of self-compatible plants to be fertilized by a  
76 different flower on the same plant (i.e. geitonogamy). Furthermore, geitonogamy could help to  
77 reproductively isolate self-compatible individuals. For instance, if pollinators commonly visit  
78 multiple flowers on the same individual, it could facilitate higher selfing rates of self-compatible  
79 individuals [12]. Different types of pollinators, such as flies vs. bees, could also differ greatly in  
80 their pollination strategies [13]. Additionally, if pollinators more commonly visit plants in very  
81 close proximity, this could contribute to greater population viscosity and result in more matings  
82 among closely related individuals that share the same mating system [14–16]. Furthermore, due  
83 to flower attractiveness, pollinators might preferentially and repeatedly visit plants exhibiting a  
84 particular mating system type. Alternatively, at the earliest stages of divergence, pollinators  
85 might show limited or no ability to differentiate between plants with alternative mating types.

86 Here, we use *Arabidopsis lyrata* ssp. *lyrata* (L.) to examine the role of differences in  
87 phenology and pollinator attraction as mechanisms of reproductive isolation in a recently  
88 diverged selfing lineage. In several populations across the range of this normally outcrossing  
89 species (multi-locus outcrossing rate:  $0.83 < T_m < 0.99$ ), all plants are self-compatible, have low  
90 outcrossing rates, and therefore reproduce primarily through selfing (multi-locus outcrossing  
91 rate:  $0.09 < T_m < 0.41$ ) [17–19]. The selfing and outcrossing populations are geographically  
92 interspersed, therefore secondary contact following evolutionary divergence in parapatry is  
93 likely. Also, the transition to selfing in these populations is thought to have happened  $< 10,000$

94 years ago because 1) the range now occupied by outcrossing and selfing populations was mostly  
95 covered by ice during the last glacial maximum [19], and 2) the selfing populations have not  
96 developed a selfing syndrome [20]. This raises the question of whether selfing populations have  
97 diverged from their outcrossing ancestors in traits conferring reproductive isolation. Similarly,  
98 given that outcrossing and selfing populations are at least partly interfertile and can regularly  
99 produce healthy offspring [21,22], F1 hybrids may be a critical factor in determining whether  
100 secondary contact would lead to coalescence of the diverged populations or alternatively  
101 reinforce their evolved differences.

102 In a common-garden experiment set within the native range of *A. lyrata*, we simulated  
103 two phases of secondary contact between selfing and outcrossing populations. The first phase  
104 corresponds to initial contact between parental plants from selfing and outcrossing populations.  
105 The second phase corresponds to secondary contact between admixed plants (hybrids between  
106 populations) and parental plants. This allowed us to test whether the evolution of selfing has led  
107 to pre-pollination isolation through divergence in phenology and/or insect pollinator attraction.  
108 Specifically, we asked whether there was reproductive isolation between outcrossing and selfing  
109 plants and their F1 hybrids through differences in 1) the timing or intensity of flowering; and 2)  
110 pollinator visitation rates and paths. Based on this, we tested whether phenological differences  
111 and pollinator behaviour reduced the opportunities for pollen exchange between mating systems.  
112 Moreover, as geitonogamy can also contribute to reproductive isolation, we quantified the  
113 opportunities for geitonogamy.

## 114 **Methods**

### 115 Study system

116 *Arabidopsis lyrata* spp. *lyrata* (L.) is a small, short-lived perennial that is native to North  
117 America. It occurs in dry-mesic habitats with shallow soils, such as rock outcrops and sand  
118 dunes. Individual plants can produce several stems that terminate in racemes of numerous (>20)  
119 small white flowers. The primary pollinators of *A. lyrata* are small solitary bees and hoverflies,  
120 which are attracted to the nectar and pollen of the flowers. The ancestral condition in  
121 *Arabidopsis lyrata* is self-incompatibility, however the barrier to self-fertilization has broken  
122 down in several North American populations [17]. Additionally, many of these newly self-  
123 compatible populations have evolved high selfing rates [19]. There is some variation in floral  
124 traits, such as flower size and pollen:ovule ratios, among selfing and outcrossing populations,  
125 which is primarily explained by population genetic background and not mating system [20].

## 126 Crossing designs

127 To generate the material needed to simulate secondary contact between diverged selfing  
128 and outcrossing populations, we sowed field-collected seeds from 12 North  
129 American *A. lyrata* populations with known breeding and mating systems [19] (seeds were  
130 kindly provided by Barbara Mable, University of Glasgow). These included six populations  
131 characterized as outcrossing (high outcrossing rates, high frequency of self-incompatible  
132 individuals, hereafter referred to as SI populations) and six populations characterized as selfing  
133 (low outcrossing rates, high frequency of self-compatible individuals, hereafter referred to as SC  
134 populations) (Table S1).

135 In 2012 and 2013, we then produced seeds by manually cross- and self-pollinating up to  
136 eight plants per population. To perform the pollinations, we emasculated a flower prior to anther  
137 dehiscence, or the same individual in ‘selfed’ crosses, and rubbed a freshly dehisced anther from  
138 a haphazardly chosen plant from the same population over its stigma. Progeny were produced

139 with the following cross-types: within SI population (SI-within), and within SC population both  
140 by crossing (SC-within) and by selfing (SC-self).

141 Then to generate the material needed to simulate admixture between the parental  
142 populations and their F1 hybrids, we performed a full diallel cross in 2014 and 2015 with six  
143 plants of each of the six SI and six SC populations. This cross produced additional progeny of  
144 the SI-within and SC-within cross types, as well as the following cross types: between SI  
145 population (SIxSI), between SC population (SCxSC), between SC and SI population reciprocally  
146 (SIxSC or SCxSI). All crosses were reciprocal and yielded a total of 1032 seed families (Table  
147 S2).

#### 148 Experimental design of common garden experiment

149 To test whether differences in phenology and flower-visitor attraction can reproductively  
150 isolate plants from selfing populations, we set up a common garden experiment at Trent  
151 University in Peterborough, Ontario, Canada. This location is at an intermediate latitude within  
152 the geographic range of the source populations (Fig. 1). From March 20 to 22, 2018, for each  
153 seed family, up to 50 seeds were sown on a moistened peat-based substrate in one pot. Plants  
154 were grown in climate chambers with 11-hour days and a 21°C/18°C day/night cycle at 95%  
155 humidity. Between April 18 and May 1, when seedlings had developed at least two true leaves,  
156 we transplanted three haphazardly chosen seedlings from each seed family to individual Stuewe  
157 and Sons Ray Leach “Cone-tainers”™ [Tangent, Oregon, USA] with the same peat-based  
158 substrate. On May 10, plants were moved to the common garden, prior to any flowering.

159 Within the common garden, plants were organized in a randomized block design. There  
160 were three replicates of three 3x6m blocks. Each of the nine resulting blocks contained between

161 150-180 individual plants distributed randomly over 180 positions within 9 cone-tainer trays  
162 with plants from each seed family and cross type evenly distributed among the blocks. In total,  
163 1509 plants were raised in the common garden. Sample sizes for the cross types were: SI-within  
164 (n=172), SC-within (n=175), SC-self (n=65), SIxSI (n=203), SCxSC (n=296), SIxSC (n=314),  
165 SCxSI (n=284).

#### 166 Phenological data

167 To test for potential reproductive isolation between the cross types due to differences in  
168 phenology, we recorded daily for each plant whether it flowered and how many open flowers it  
169 had. Open flowers were defined as flowers with visible reproductive organs (stigma and anthers)  
170 and that still had petals attached to the flower. Besides calculating opportunities for pollen-  
171 transfer between outcrossing and selfing populations, this allowed us to compare the time to  
172 onset of flowering, flowering duration, time of peak flowering, and the maximum flower number  
173 (i.e., the number of flowers on the day of peak flowering) for each individual for each of the  
174 cross-types.

#### 175 Flower visitor observations

176 To test for differences in insect attraction and flower visitor movements within and  
177 between plants, we recorded flowers with GoPro Hero Session<sup>®</sup> [San Mateo, California, USA]  
178 cameras. Specifically, we tested whether there were differences in the potential for  
179 geitonogamous selfing (visitor movement within the same plant), and for outcrossing (i.e., visitor  
180 movement between plants) within and between mating system. To standardize the recording  
181 procedure, 4-6 flowering plants (depending on their size) were taken from their blocks and  
182 placed in a tray located at the front of their respective blocks. This method ensured clear video



183 footage of multiple focal plants simultaneously, while minimizing interfering with the visual  
184 context of the pollinators provided by the configuration of plants in the block design. To make  
185 sure that focal plants had a different set of neighbors for each set of observations, we combined  
186 flowering individuals systematically according to their position in the block, going through the  
187 block in three different ways: 1) taking consecutive plants in a vertical direction, 2) taking  
188 consecutive plants in a horizontal direction, and 3) taking plants from the same position but in  
189 different trays. Due to this approach, the cross type of the focal plants combined in the video-  
190 frames was random.

191 We recorded 12-15-minute-long videos that were later trimmed to the central 10 minutes  
192 to exclude potential effects of disturbance during starting and stopping the cameras. In total, 500  
193 videos were taken throughout the flowering period, of which a random subset of 140 videos  
194 (23.3 hours of video) were analysed by the first author in a random order. In total, these videos  
195 included 379 unique individuals (41% of all flowering individuals in the common garden), and  
196 123 plants were observed in multiple videos. For each visitor, we recorded whether it was a  
197 solitary bee or hoverfly, the duration of the visit and the path it took (see below). Finer  
198 taxonomic identification was not possible due to the video resolution, but we took high quality  
199 photographs to identify the most common visitors: hoverflies (Syrphidae) *Eristalis arbustorum*,  
200 *Syritta pipiens*, *Sphaerophoria* sp. and *Toxomerus marginatus*, and solitary bees from the family  
201 Halictidae (kindly identified by Bill Crins, Toronto, Canada).

202 The path that each visitor took after its initial visit to a flower was recorded to test  
203 whether plants from selfing populations received fewer visits than those from outcrossing  
204 populations as is expected in selfing plants [23]. Moreover, because pollinators will often focus  
205 on exploiting one type of flower and/or floral scent, we tested whether visitors were more likely

206 to move to neighbouring plants with the same mating system than to plants with a different  
207 mating system, and whether progeny from crosses between mating system received fewer visits  
208 than progeny from crosses within the same mating system. We classified visitor paths as: “away”  
209 – the visitor left the video frame after an initial visit; “same” – the visitor visited a second flower  
210 on the same individual; or to one of the cross types as defined above (“SI-within”, “SC-within”,  
211 “SC-self”, “SIxSI”, “SCxSC”, “SIxSC”, “SCxSI”) – the visitor went to a flower on a different  
212 individual. This allowed us to classify the flight paths of the visitors and compare visitation rates  
213 among destinations.

#### 214 Statistical analyses

215 All statistical analyses were done in R 3.5.1 [24]. To test if there were differences in the  
216 time of peak flowering and duration of flowering between SI and SC cross types (SI-within, SC-  
217 within, SC-self) and between within population cross types and between population cross types  
218 (SI-within, SC-within, SC-self vs SIxSI, SCxSC, SIxSC, SCxSI), we used Gaussian linear  
219 mixed-effects models implemented in lme4 [25] using *cross type* as a fixed effect, and *maternal*  
220 *population* and *paternal population* as random effects. We used "Improper" prior distributions,  
221 i.e. distributions with density functions that do not integrate to 1 and are therefore not "proper"  
222 probability distributions [26]. Specifically,  $p(\beta) \propto 1$  was implemented for the model coefficients  
223 and  $p(\sigma^2) \propto 1/\sigma^2$  for the variance parameters. To obtain the posterior distribution, 5000 values  
224 were directly simulated from the joint posterior distribution of the model parameters using the  
225 function `sim` of the R package ‘arm’ [27]. The means of the simulated values from the joint  
226 posterior distributions of the model parameters were then used as estimates, and the 2.5% and  
227 97.5% quantiles were used as the lower and upper limits of the 95% credible intervals to make  
228 comparisons among cross types.

229 To test if there were differences in the mean maximum flower number among the cross  
230 types, a hurdle model (hurdle function, package 'pscl'; [28,29]) with a negative binomial  
231 distribution that included *maximum flower number* as the response variable and *cross type* as a  
232 fixed effect was performed. The hurdle model accounts for the excess number of zero counts in  
233 the maximum flower number data. This model specifies one process for zero counts and a  
234 separate process for positive counts. The zero counts (flower number as either 0 or 1) were then  
235 modelled with a binomial logit model and the positive counts (plants that flowered) with a  
236 truncated negative binomial model. The hurdle model also allowed us to calculate the probability  
237 that individuals from a cross type would flower.

238 Pollinator visitation rate (per plant) was analysed separately for the two main visitor  
239 classes hoverflies and solitary bees. The cross type 'SC-self' was excluded from the analyses of  
240 pollinator visitation due to low sample size. To test if there were differences in the frequency of  
241 pollinator visits among the cross types, two identical generalized linear mixed-effects models  
242 with negative binomial distributions with *number of visits* as the response variable (one model  
243 for visits made by hoverflies and another one for solitary bees). The explanatory variables were  
244 *cross type* and *flower number* as fixed effects, and *maternal population* and *paternal population*  
245 as random effects. In these models, the number of adaptive Gauss-Hermite quadrature points  
246 (nAGQ) was set to zero, which optimizes the random effects and the fixed-effects coefficients in  
247 the penalized iteratively reweighted least squares step [25]. This results in a faster but less  
248 precise parameter estimation for generalized mixed effect models [25]. These models used a log-  
249 link function. Improper prior distributions were used, as in the analyses of time of peak  
250 flowering and flowering duration.

251 Pollinator visitation paths were analysed in two ways. The probability that a pollinator  
252 would make a certain choice after landing on a flower was analysed with a multinomial logistic  
253 regression as implemented in the function `multinom` in the package 'nnet' [30]. *Path* in the  
254 multinomial model included all cross types and the same plant (opportunity for geitonogamy) as  
255 path options, along with the option of leaving the observation frame. This model included both  
256 *cross type* and *flower number* as fixed effects and *path* as the response variable using a logit link  
257 function. To further parse the pollinator preference and the effect of flower number and distance  
258 between plants in the frame, a conditional logistic regression (function `clogit`, package 'survival';  
259 [31]) was performed. The conditional logistic regression was performed separately for hoverflies  
260 and solitary bees and included the insect's selection for any of the cross types in the same video  
261 frame as the response variable, as well as *relative flower number*, *relative distance*, and *cross*  
262 *type* as fixed effects, and finally *switch ID* as the strata. The strata command specifies the group  
263 of observations inherent to our video recordings. The strata in this case specifies the group of  
264 choice options for each pollinator in each video. Switch ID was defined as: what the insect  
265 selected (1) and everything the insect did not select (0) and incorporated information about the  
266 distance to the other individuals and the flower number relative to the other individuals. The  
267 cross type 'SI-within' was used as the baseline as this cross type represents the ancestral  
268 condition in *A. lyrata*. *Relative flower number* and *relative ranked distance* were obtained by  
269 dividing by the maximum value within the same video-frame.

#### 270 Pollen-transfer probabilities

271 To examine whether there were differences in the opportunities for self- or outcross  
272 pollination between selfing and outcrossing plants, we used the empirical information on  
273 phenology and pollinator behaviour to model opportunities for outcrossing between 'SI-within'

274 and ‘SC-within’ plants and for geitonogamous pollen movement within plants. Between  
275 population cross types were excluded from these analyses. In terms of outcrossing, we were  
276 interested in opportunities for pollen exchange within versus between mating types (e.g., whether  
277 plants from self-compatible populations of *A. lyrata* had more opportunity to mate with each  
278 other than with plants from self-incompatible populations) as a potential mechanism of  
279 reproductive isolation. To do this, we used calculations of  $K_{ij}$  - the “pollen transfer  
280 probabilities” outlined in [32]. Here, we use the calculation of  $K$  to refer to the opportunity for  
281 mating between plants from different populations in the common garden, based on the overlap in  
282 the number of flowers of each mating type per day.

283 In [32],  $K_{ij}$  refers to the probability that flowers at the  $i$ th position on an inflorescence are  
284 pollinated by flowers on other plants at the  $j$ th position. Here, we are not interested in the effects  
285 of floral position on pollen transfer probabilities, but in the possible effect of mating type.  
286 Accordingly, we estimated opportunities for pollen transfer within versus between self-  
287 incompatible and self-compatible mating types by calculating the following values of  $K$ :

- 288 1.  $K_{ss}$
- 289 2.  $K_{so}$
- 290 3.  $K_{os}$
- 291 4.  $K_{oo}$

292 where,  $K_{ss}$  refers to the opportunity for plants from self-compatible populations (SC-within  
293 cross type) to fertilize flowers on other plants from self-compatible populations,  $K_{so}$  refers to the  
294 opportunity for plants from self-compatible populations to fertilize flowers on plants from self-  
295 incompatible populations (SI-within cross type), and so on.

296 Brunet and Charlesworth define the probability of pollen transfer between flowers of type  $i$  and  
297  $j$  on day  $c$ ,  $K_{ij}$  as:  $\frac{\sum_c f_{cj}^m N_{ci}^f}{\sum_c N_{cj}^m}$  where,  $f_{cj}^m = \frac{N_{cj}^m}{\sum_j N_{cj}^m}$ .

298 In the above expressions, the superscripts  $m$  and  $f$  refer to plants in the male and female  
299 phases. For *A. lyrata*, which is a simultaneous hermaphrodite,  $m = f$ , but because we are  
300 interested in pollen movement between plants,  $i \neq j$ . To calculate mating-type specific values of,  
301 for example,  $K_{ss}$ , we calculated  $f^m$  as the proportion of all flowers open per day in the common  
302 garden that were from individual plants from self-compatible populations (the SC-within cross  
303 type). Therefore, for this calculation, the value of the numerator,  $N_{cj}^m$ , was calculated only for  
304 those plants. Plants from self-incompatible populations were included in the calculation  
305 of  $N^m$  for  $K_{os}$  and  $K_{oo}$ . For all values of  $K$ , all plants were included in the calculation of the  
306 denominator of  $f^m$ ,  $\sum_j N_{cj}^m$ .

307 The calculated values of  $K$  are frequency dependent - a small group of plants of one  
308 mating type surrounded by plants of the opposite mating type would have more opportunities for  
309 between, rather than within mating-type pollen transfer. Because we were specifically interested  
310 in opportunities for pollen transfer driven by phenology, not frequency, we used bootstrapping to  
311 generate 200 randomly sampled, equal-sized populations of plants of each mating type for the  
312 calculation of  $K$ . For each mating type, we sampled 200 plants (with replacement) of each cross  
313 type for inclusion in each calculation of  $K$ .

314 Two values of  $K$  refer to within mating-type fertilization opportunities and two of them  
315 to between mating-type fertilization opportunities. To evaluate whether plants from populations  
316 of the two different mating types (self-compatible versus self-incompatible) differed in the

317 proportion of within- versus between mating-type pollen transfer opportunities, we used linear,  
318 mixed models for each set of bootstrapped values of  $K$ . Population was included as random  
319 effect in these models. In the absence of phenological differences between plants from self-  
320 compatible and self-incompatible populations, the expected value of the parameter estimate for  
321 the mating-type effect is 0. Accordingly, to test whether plants representing the two mating types  
322 differed in their opportunities for within- versus between mating-type pollen transfer, we tested  
323 whether the distribution of parameter estimates from each set of bootstrapped values of  
324  $K$  differed from 0 using a two-tailed  $t$ -test.

325         The opportunity for geitonogamous self-pollination is determined by the number of  
326 simultaneously open flowers per plant and the likelihood that pollinators will move from one  
327 flower to another on the same plant. Videos of pollinator movements provide per-population  
328 estimates of that likelihood. We calculated the opportunity for geitonogamous pollen  
329 transfer,  $G_c$ , for plants with  $n$  open flowers as a geometric series of the likelihood of within-plant  
330 pollinator movement  $x$ . That is, for each day  $c$ ,  $G_c = x + x^2 + x^3 + \dots + x^{n-1}$ . The total  
331 opportunity for geitonogamous pollen transfer over the flowering season was calculated as  $\sum_c G_c$ .

## 332 **Results**

### 333 Phenology

334         Of the 1509 plants in the common garden, 938 flowered (62%). The main flowering  
335 period lasted six weeks from June 1 to July 14, although a few individuals flowered later (nine  
336 individuals flowered a second time and 10 individuals flowered for the first time as late as  
337 September) (Fig. S1). The probability of an individual flowering varied by cross type. SI-within  
338 and SC-within cross types did not strongly differ from each other in the probability of flowering

339 (55% and 61%, respectively; CrI overlapping; Fig. 2a), however the probability of flowering of  
340 the SC-self cross type (29%) was substantially lower (Fig. 2a). So, while progeny formed by  
341 selfing flowered less, merely having the ability to self did not substantially decrease the  
342 probability of flowering when compared to individuals from outcrossing populations. The F1  
343 hybrid cross types did not differ from the within-population cross types in the probability of  
344 flowering (54%-64%; CrIs overlapping; Fig. 2a), with the exception of the SIxSI cross type  
345 being more likely (83%) to flower than the other F1 or within-population cross types (Fig. 2a).  
346 Additionally, the direction of the cross for SIxSC and SCxSI hybrid F1 crosses did not have an  
347 obvious effect on flowering probability, as both cross types had similar probabilities (63% and  
348 64% respectively) for flowering (Fig. 2a).

349         The time of peak flowering differed among the cross types. While there were no strong  
350 differences in the time of peak flowering between the SI-within and SC-within cross types, the  
351 SC-self cross type peaked in flowering about one to two days earlier (average = 27.6 days) than  
352 the other within or F1 cross types (however, CrIs overlapped with all cross types except SIxSI;  
353 Fig. 2b). The day of peak flowering did not differ between SIxSC and SCxSI plants, indicating  
354 that cross direction did not influence the time of peak flowering (CrIs overlapping; Fig. 2b).  
355 There were also no strong differences in peak flowering between the within-population and F1  
356 cross types (CrIs overlapping), with the exception that the SIxSI cross type tended to reach peak  
357 flowering one to two days later (Fig. 2b). Similarly, flowering duration did not strongly differ  
358 among the cross types (Fig. 2c), but the SC-self cross type tended to have a shorter duration (6-  
359 15 days) than the other within population cross types (11-19 days) or F1 cross types (15-21 days)  
360 (Fig. 2c).



361 For flowering plants of all cross types, the mean maximum number of open flowers on a  
362 single day ranged from 10.8 to 13.6 flowers. After correcting for zero-inflation in the maximum  
363 flower number model, there were no strong differences in maximum flower number among the  
364 cross types.

### 365 Pollinator visitation

366 There were no differences in flower visitation between the within population cross types  
367 or between the within population cross types and the F1 hybrids (all CrIs overlapping; Fig. 3a,  
368 Fig. 3b). Solitary bees and hoverflies were the predominant visitors, and they had similar  
369 visitation frequencies and no clear pattern of preference for any of the cross types (compare Fig.  
370 3a and 3b). The behaviour of both types of pollinators appeared to facilitate geitonogamous self-  
371 pollination, as ~50% of the movements between flowers were to a different flower on the same  
372 plant (Fig. 4). When cases of a pollinator visiting another flower on the same plant were not  
373 considered, the odds of an initial visitor moving to a plant in the frame decreased by 89%  
374 (solitary bees) and 94% (hoverflies) for each unit increasing relative distance (significantly  
375 negative odds-ratios for relative distance; Table 1). In other words, pollinators were more prone  
376 to visit the nearest plant, regardless of the cross type or the number of flowers on the  
377 neighbouring plant.

### 378 Opportunities for pollen-transfer

379 Based on a bootstrapping approach that integrated the timing and intensity of flowering  
380 throughout the entire flowering period, the opportunity for between vs. within cross type pollen-  
381 transfer was nearly equal both for the SI-within and SC-within cross type (Fig. 5). In other  
382 words, slight shifts in phenology and flowering intensity (Fig. S1) are unlikely to lead to

383 reproductive isolation. Additionally, a similar approach that also took into account the pollinator  
384 paths showed that the opportunity for geitonogamy arising from plants having multiple flowers  
385 open simultaneously and the high frequency of within plant movement of pollinators (Fig. 4) did  
386 not differ between SI-within and SC-within plants.

## 387 **Discussion**

388 Our common garden experiment simulating secondary contact between outcrossing and  
389 selfing populations showed that phenology largely overlapped between plants from outcrossing  
390 and selfing populations. There were also no differences in pollinator preference related to mating  
391 system. Regardless of mating system, pollinators tended to move between flowers on the same  
392 plant, thus facilitating opportunities for geitonogamy. Our models of pollen-transfer  
393 probabilities, which integrated differences in phenology (timing and intensity of flowering),  
394 revealed equal opportunities for pollen-transfer within- and among mating systems. Together,  
395 this suggests that prezygotic pre-pollination mechanisms do not strongly reproductively isolate  
396 plants from selfing and outcrossing populations of *Arabidopsis lyrata*. However, because plants  
397 simultaneously open multiple flowers, and pollinators predominantly move from flower to  
398 flower on the same plant, our data suggest that there is a large opportunity for geitonogamy in  
399 this system. Such geitonogamy could isolate selfers to some extent.

### 400 Pollinator visitation

401 Our results show that differences in pollinator preference do not play a large role in the  
402 reproductive isolation of the newly diverged selfing populations. We found no differences in the  
403 preferences of the two main pollinator types, hoverflies and solitary bees, among the cross types.  
404 Additionally, when given a choice pollinators preferred to stay on the same individual versus

405 exploring nearby plants regardless of cross type. When they did choose to visit another plant,  
406 pollinators preferred to go to the closest plant regardless of how many flowers it had or what  
407 cross type it was. This lack of pollinator preference could be due to the pollinators simply being  
408 generalists, as previous studies have shown that hoverflies, for instance, are not very choosy with  
409 respect to the plants they visit [13]. Additionally, there could be a lack of floral differences  
410 because selfing individuals still need pollinators to transfer their pollen as they are not  
411 completely autonomous [20]. Overall, pollinator preference seems to be playing little role in  
412 differentiating the selfing from outcrossing populations of *A. lyrata*.

413           Nevertheless, the behaviour of the pollinators could favour selfing for several other  
414 reasons. For instance, we found that pollinators often visit different flowers on the same  
415 individual, irrespective of mating system. This should provide ample opportunity for within-  
416 individual pollen transfer [3,33], and thus for self-compatible individuals to self-fertilize through  
417 geitonogamy. Moreover, when pollinators moved between plants, they mainly moved between  
418 nearby individuals. Given that *A. lyrata* seeds have no mechanisms to promote dispersal, and  
419 plants can produce over 1000 seeds per season, neighbouring plants could be highly related to  
420 each other [34]. As a consequence, the observed behaviour of pollinators could cause mate  
421 limitation in self-incompatible plants, making the transfer of cross-pollen rare and/or mainly  
422 from incompatible partners (e.g., from relatives that share S-alleles). In self-compatible plants,  
423 on the other hand, geitonogamy may help overcome this mate limitation and provide  
424 reproductive assurance [35]. Even without mate limitation, where geitonogamy does not provide  
425 reproductive assurance but rather results in seed discounting, selfing could still be favoured due  
426 to the associated inherent transmission advantage [36]. The transmission advantage would favour  
427 selfers if inbreeding depression is low. Indeed, the relatively low estimates of inbreeding

428 depression for our study populations [37] imply that such transmission advantage alone could be  
429 sufficient to drive the evolution of selfing. There is usually a low frequency of self-compatible  
430 individuals in outcrossing populations [19,38]. Since the observed pollinator behaviour should  
431 promote geitonogamous selfing, it remains enigmatic why selfing has not evolved in all North  
432 American populations of *A. lyrata*.

#### 433 Potential consequences of admixture

434 We found that F1 hybrid cross types had a similar phenology and pollinator visitation as  
435 the parental cross types. Earlier studies have shown that hybrids between outcrossing and selfing  
436 plants can be intermediate for phenological traits. For instance, in the genus *Clarkia*,  
437 hybridization between selfing and outcrossing populations resulted in floral characteristics and  
438 flowering times that were intermediate between the parental populations [39]. Our results show  
439 similar relationships between F1 hybrids and the parental populations in regard to flowering  
440 probability and time of peak flowering. This suggests that in a scenario of secondary contact, F1  
441 hybrids would likely function as a bridge to further gene exchange between selfing and  
442 outcrossing plants, which could potentially lead to the parental populations merging [40].  
443 Whether the resulting admixed populations will maintain a mixed mating system [2], or evolve  
444 to become predominantly selfing or outcrossing remains to be tested. Initially, as inbreeding  
445 depression tends to be low [37,41], selfing may be favoured due to the associated inherent  
446 transmission advantage. However, on longer timescales, expression of drift load may select  
447 against selfing as shown in selfing populations of *A. lyrata* [22](but see [42]). It would therefore  
448 be of interest to monitor the performance and mating system of admixed populations over  
449 multiple years.

#### 450 Conclusions

451 Our common garden experiment showed that, although pollinator behaviour may isolate  
452 selfers by promoting geitonogamy, outcrossing and selfing *A. lyrata* populations are only weakly  
453 reproductively isolated via pre-pollination mechanisms. These findings differ from findings in  
454 other systems with a recent transition to selfing (e.g., [43,44]). The weak isolation between  
455 selfing and outcrossing populations of *A. lyrata* is likely because its transition to selfing is even  
456 more recent, and has not led to evolution of a selfing syndrome [20]. Future studies could  
457 investigate if reproductive isolation due to prezygotic pre-pollination mechanisms are larger in  
458 natural populations, giving specific attention to parapatric selfing and outcrossing populations.  
459 Moreover, to what extent other mechanisms such as niche differentiation and genetic  
460 incompatibilities contribute to reproductive isolation remains to be investigated.

#### 461 **Acknowledgements**

462 Christina Steinecke and Ryan Holt helped with data collection. Colleen White helped with  
463 transplanting. Bill Crins taxonomically identified pollinators. Fränzi Korner-Nievergelt and Pius  
464 Korner-Nievergelt (oikostat GmbH) helped with parts of the statistical analyses. Barbara Mable  
465 provided the source material (seeds) from wild populations. Yan Li, Ekaterina Mamonova, and  
466 Sina Konitzer-Glückner helped with the crosses to produce the seeds used in the experiment.

#### 467 **Funding**

468 This work was supported by the German Research Foundation (Deutsche  
469 Forschungsgemeinschaft - Project number 388824194 to MS).

#### 470 **Data Accessibility**

471 Data will be made available from the Dryad Digital Repository upon acceptance.

#### 472 **References**

- 473 1. Barrett SCH. 2002 The evolution of plant sexual diversity. *Nat. Rev. Genet.* **3**, 274–284.  
474 (doi:10.1038/nrg776)
- 475 2. Goodwillie C, Kalisz S, Eckert CG. 2005 The Evolutionary Enigma of Mixed Mating  
476 Systems in Plants: Occurrence, Theoretical Explanations, and Empirical Evidence. *Annu.*  
477 *Rev. Ecol. Evol. Syst.* **36**, 47–79. (doi:10.1146/annurev.ecolsys.36.091704.175539)
- 478 3. Darwin C. 1876 *The effects of cross and self fertilisation in the vegetable kingdom / by*  
479 *Charles Darwin*. London □: J. Murray,. (doi:10.5962/bhl.title.19501)
- 480 4. Jain SK. 1976 The Evolution of Inbreeding in Plants. *Annu. Rev. Ecol. Syst.* **7**, 469–495.  
481 (doi:10.1146/annurev.es.07.110176.002345)
- 482 5. Sicard A, Lenhard M. 2011 The selfing syndrome: A model for studying the genetic and  
483 evolutionary basis of morphological adaptation in plants. *Ann. Bot.* **107**, 1433–1443.  
484 (doi:10.1093/aob/mcr023)
- 485 6. Rieseberg LH, Willis JH. 2007 Plant Speciation 10.1126/science.1137729. *Science (80- )*.  
486 **317**, 910–914.
- 487 7. Coyne J, Orr H. 2004 *Speciation*. Sunderland, MA: Sinauer Associates. See  
488 <http://www.joelvelasco.net/teaching/systematics/CoyneOrr-Speciation-IntroAppendix.pdf>.
- 489 8. Baack E, Melo MC, Rieseberg LH, Ortiz-Barrientos D. 2015 The origins of reproductive  
490 isolation in plants. *New Phytol.* **207**, 968–984. (doi:10.1111/nph.13424)
- 491 9. Lowry DB, Rockwood RC, Willis JH. 2008 Ecological reproductive isolation of coast and  
492 inland races of *Mimulus guttatus*. *Evolution (N. Y.)*. **62**, 2196–2214. (doi:10.1111/j.1558-  
493 5646.2008.00457.x)

- 494 10. Widmer A, Lexer C, Cozzolino S. 2009 Evolution of reproductive isolation in plants.  
495 *Heredity*. **102**, 31–38. (doi:10.1038/hdy.2008.69)
- 496 11. Martin NH, Willis JH. 2007 Ecological divergence associated with mating system causes  
497 nearly complete reproductive isolation between sympatric *Mimulus* species. *Evolution*. **61**,  
498 68–82. (doi:10.1111/j.1558-5646.2007.00006.x)
- 499 12. Karron JD, Holmquist KG, Flanagan RJ, Mitchell RJ. 2009 Pollinator visitation patterns  
500 strongly influence among-flower variation in selfing rate. *Ann. Bot.* **103**, 1379–1383.  
501 (doi:10.1093/aob/mcp030)
- 502 13. Gervasi DDL, Schiestl FP. 2017 Real-time divergent evolution in plants driven by  
503 pollinators. *Nat. Commun.* **8**, 14691. (doi:10.1038/ncomms14691)
- 504 14. Harder LD, Barrett SCH. 1996 Pollen Dispersal and Mating Patterns in Animal-Pollinated  
505 Plants. In *Floral Biology*, pp. 140–190. Boston, MA: Springer US. (doi:10.1007/978-1-  
506 4613-1165-2\_6)
- 507 15. Barrett SCH, Richards AJ, Bayliss MW, Charlesworth D, Abbott RJ. 2003 Mating  
508 strategies in flowering plants: The outcrossing-selfing paradigm and beyond. In  
509 *Philosophical Transactions of the Royal Society B: Biological Sciences*, pp. 991–1004.  
510 (doi:10.1098/rstb.2003.1301)
- 511 16. Mitchell RJ, Irwin RE, Flanagan RJ, Karron JD. 2009 Ecology and evolution of plant-  
512 pollinator interactions. *Ann. Bot.* **103**, 1355–1363. (doi:10.1093/aob/mcp122)
- 513 17. Mable BK, Robertson A V., Dart S, Berardo C Di, Witham L. 2005 Breakdown of self-  
514 incompatibility in the perennial *Arabidopsis lyrata* (Brassicaceae) and its genetic

- 515 consequences. *Evolution*. **59**, 1437–1448. (doi:10.1111/j.0014-3820.2005.tb01794.x)
- 516 18. Mable BK, Adam A. 2007 Patterns of genetic diversity in outcrossing and selfing  
517 populations of *Arabidopsis lyrata*. *Mol. Ecol.* **16**, 3565–3580. (doi:10.1111/j.1365-  
518 294X.2007.03416.x)
- 519 19. Foxe JP, Stift M, Tedder A, Haudry A, Wright SI, Mable BK. 2010 Reconstructing origins  
520 of loss of self-incompatibility and selfing in North American *Arabidopsis lyrata*: A  
521 population genetic context. *Evolution*. **64**, 3495–3510. (doi:10.1111/j.1558-  
522 5646.2010.01094.x)
- 523 20. Carleial S, van Kleunen M, Stift M. 2017 Small reductions in corolla size and pollen:  
524 ovule ratio, but no changes in flower shape in selfing populations of the North American  
525 *Arabidopsis lyrata*. *Oecologia* **183**, 401–413. (doi:10.1007/s00442-016-3773-4)
- 526 21. Willi Y. 2013 The battle of the sexes over seed size: Support for both kinship genomic  
527 imprinting and interlocus contest evolution. *Am. Nat.* **181**, 787–798. (doi:10.1086/670196)
- 528 22. Willi Y. 2013 Mutational meltdown in selfing *Arabidopsis lyrata*. *Evolution*. **67**, 806–815.  
529 (doi:10.1111/j.1558-5646.2012.01818.x)
- 530 23. Fausto JA, Eckhart VM, Geber MA. 2001 Reproductive assurance and the evolutionary  
531 ecology of self-pollination in *Clarkia xantiana* (Onagraceae). *Am. J. Bot.* **88**, 1794–1800.  
532 (doi:10.2307/3558355)
- 533 24. R Core Team. 2019 R: A language and environment for statistical computing.
- 534 25. Bates D, Mächler M, Bolker BM, Walker SC. 2015 Fitting linear mixed-effects models  
535 using lme4. *J. Stat. Softw.* **67**. (doi:10.18637/jss.v067.i01)



- 536 26. Korner-Nievergelt F, Roth T, von Felten S, Guélat J, Almasi B, Korner-Nievergelt P.  
537 2016 *Bayesian Data Analysis in Ecology Using Linear Models with R, BUGS, and Stan*.  
538 Elsevier Inc. (doi:10.1016/C2013-0-23227-X)
- 539 27. Gelman A, Hill J. 2006 *Data Analysis Using Regression and Multilevel/Hierarchical*  
540 *Models*. Cambridge University Press. (doi:10.1017/cbo9780511790942)
- 541 28. Zeileis A, Kleiber C, Jackman S. 2008 Regression models for count data in R. *J. Stat.*  
542 *Softw.* **27**, 1–25. (doi:10.18637/jss.v027.i08)
- 543 29. Jackman S. 2017 pscl: Classes and Methods for R Developed in the Political Science  
544 Computational Laboratory.
- 545 30. Venables WN, Ripley BD. 2002 *Modern Applied Statistics with S*. (doi:10.1007/978-0-  
546 387-21706-2)
- 547 31. Therneau TM, Grambsch PM. 2000 *Modeling survival data□: extending the Cox model*.  
548 Springer. See <https://cran.r-project.org/web/packages/survival/citation.html>.
- 549 32. Brunet J, Charlesworth D. 1995 Floral sex allocation in sequentially blooming plants.  
550 *Evolution.* **49**, 70–79. (doi:10.1111/j.1558-5646.1995.tb05959.x)
- 551 33. Harder LD, Barrett SCH. 1995 Mating cost of large floral displays in hermaphrodite  
552 plants. *Nature* **373**, 512–515. (doi:10.1038/373512a0)
- 553 34. Willi Y, Maattanen K. 2011 The relative importance of factors determining genetic drift:  
554 Mating system, spatial genetic structure, habitat and census size in *Arabidopsis lyrata*.  
555 *New Phytol.* **189**, 1200–1209. (doi:10.1111/j.1469-8137.2010.03569.x)
- 556 35. Baker HG. 1955 Self-compatibility and establishment after "long-distance" dispersal.

- 557           *Evolution*. **9**, 347–349. (doi:10.1111/j.1558-5646.1955.tb01544.x)
- 558   36.   Fisher RA. 1941 Average excess and average effect of an allelic substitution. *Ann. Eugen.*  
559           **11**, 53–63. (doi:10.1111/j.1469-1809.1941.tb02272.x)
- 560   37.   Carleial S, van Kleunen M, Stift M. 2017 Relatively weak inbreeding depression in selfing  
561           but also in outcrossing populations of North American *Arabidopsis lyrata*. *J. Evol. Biol.*  
562           **30**, 1994–2004. (doi:10.1111/jeb.13169)
- 563   38.   Mable BK, Hagemann J, Kim ST, Adam A, Kilbride E, Weigel D, Stift M. 2017 What  
564           causes mating system shifts in plants? *Arabidopsis lyrata* as a case study. *Heredity*. **118**,  
565           52–63. (doi:10.1038/hdy.2016.99)
- 566   39.   Moore DM, Lewis H. 1965 The Evolution of Self-Pollination in *Clarkia xantiana*.  
567           *Evolution*. **19**, 104. (doi:10.2307/2406299)
- 568   40.   Rhymer JM, Simberloff D. 1996 Extinction by hybridization and introgression. *Annu. Rev.*  
569           *Ecol. Syst.* **27**, 83–109. (doi:10.1146/annurev.ecolsys.27.1.83)
- 570   41.   Li Y, van Kleunen M, Stift M. 2019 Sibling competition does not magnify inbreeding  
571           depression in North American *Arabidopsis lyrata*. *Heredity*. **123**, 723–732.  
572           (doi:10.1038/s41437-019-0268-1)
- 573   42.   Joschinski J, van Kleunen M, Stift M. 2015 Costs associated with the evolution of selfing  
574           in North American populations of *Arabidopsis lyrata*? *Evol. Ecol.* **29**, 749–764.  
575           (doi:10.1007/s10682-015-9786-3)
- 576   43.   Ramsey J, Bradshaw HD, Schemske DW. 2003 Components of reproductive isolation  
577           between the monkeyflowers *Mimulus lewisii* and *M. cardinalis* (Phrymaceae). *Evolution*.

578           **57**, 1520–1534. (doi:10.1111/j.0014-3820.2003.tb00360.x)

579   44.   Briscoe Runquist RD, Chu E, Iverson JL, Kopp JC, Moeller DA. 2014 Rapid evolution of  
580   reproductive isolation between incipient outcrossing and selfing *Clarkia* species.

581   *Evolution*. **68**, 2885–2900. (doi:10.1111/evo.12488)

582

583

584

585

586

587

588

589

590

591

592

593

594

595 **Figure Captions**

596 Figure 1: Map of the location of the common garden experiment in relation to the source  
597 populations. Gray circles represent selfing populations and black diamonds represent outcrossing  
598 populations. The black X represents the location of the common garden at Trent University,  
599 Peterborough, Ontario.

600 Figure 2: Panel of effect plots for the differences in phenological traits among the cross types  
601 (n=1509). a) The probability of flowering per cross type. Fitted values are obtained from the  
602 hurdle model. b) The day of peak flowering per cross type. This was calculated as the day where  
603 each individual had the highest number of flowers during the total flowering period. Fitted  
604 values obtained are from the Gaussian linear model that included *day of peak flowering* as the  
605 response variable. c) The flowering duration (days) per cross type. Fitted values obtained are  
606 from the Gaussian linear model that included *flowering duration* as the response variable.  
607 Vertical bars in all figures represent the 95% credible intervals. SI-within= within outcrossing  
608 population cross type, SC-within= within selfing population cross type, SC-self= selfed, SI= self-  
609 incompatible, SC= self-compatible. The probability of flowering and time of peak flowering  
610 varied among the cross types. Flowering duration did not strongly differ among the cross types.

611 Figure 3: Differences in pollinator visitation (number of visits) by a) solitary bees and b)  
612 hoverflies among the cross types (n=502). The fitted values obtained are from the generalized  
613 linear models with negative binomial distributions described in the methods. Vertical bars  
614 represent the 95% credible intervals. SI-within= within outcrossing population cross type, SC-  
615 within= within selfing population cross type, SI= self-incompatible, SC= self-compatible. The

616 number of visits did not strongly differ among the cross types and pollinator identity had a minor  
617 influence on the number of visits. Solitary bees made slightly more visits overall.

618 Figure 4: Stacked bar plot representing the probability of pollinators making a choice to visit an  
619 individual of any cross type after visiting an individual of a certain cross type. Probabilities were  
620 obtained from the multinomial model (and thus corrected for the number of available flowers on  
621 each plant in the array). Pollinators could also choose to visit a flower on the same plant  
622 (“same”) or to leave the experimental setup (“away”). The cross types on the x-axis represent the  
623 cross type of the initial visit. The stacked blue bars represent the probability of that cross type  
624 being selected after a visit to the cross type on the x-axis. SI-within= within outcrossing  
625 population cross type, SC-within= within selfing population cross type, SI= self-incompatible,  
626 SC= self-compatible.

627 Figure 5: Representative bootstrapped run of the distribution of the self- and outcross pollen  
628 transfer opportunities for self-compatible and self-incompatible individuals. The parameter  
629 estimate for the difference in transfer-probability for the shown run was 0.024, and thus close to  
630 the mean value of 0.020 across all the bootstrapped samples. There were no significant  
631 differences in the opportunities for pollen transfer.

632

633

634

635

636 Table 1. Summary of results from the conditional logistic regression model that analyzed  
 637 whether *relative flower number*, *relative distance*, or *cross type* influenced the pollination path.  
 638 Cross type ‘SI- within’ was used as the baseline. Hoverflies: n=546, number of events = 142,  
 639 Likelihood ratio test= 62.16 on 7 df, p=<.001\*. Solitary Bees: n=541, number of events=140,  
 640 Likelihood ratio test= 45.24 on 7 df, p=<.001\*. Symbols and abbreviations used in the column  
 641 headings: SE= standard error; z= Wald statistic. For both hoverflies and solitary bees, relative  
 642 plant distance had the greatest influence on pollinator choice. There was no strong preference for  
 643 any of the cross types or individuals with more flowers. Significant effects are highlighted in  
 644 **bold**.

| Visitor              | Fixed effect           | Odds Ratio  | SE          | z            | Pr(> z )         | 95% confidence interval |             |
|----------------------|------------------------|-------------|-------------|--------------|------------------|-------------------------|-------------|
| <b>Solitary bees</b> | Relative Flower Number | 1.10        | 0.32        | 0.29         | 0.77             | 0.59                    | 2.04        |
|                      | Relative Distance      | <b>0.11</b> | <b>0.38</b> | <b>-5.73</b> | <b>&lt;.001*</b> | <b>0.05</b>             | <b>0.24</b> |
|                      | SC-within              | 2.01        | 0.39        | 1.80         | 0.07             | 0.94                    | 4.30        |
|                      | SIxSI                  | 1.32        | 0.39        | 0.71         | 0.48             | 0.62                    | 2.82        |
|                      | SCxSC                  | 0.96        | 0.39        | -0.12        | 0.91             | 0.44                    | 2.07        |
|                      | SIxSC                  | 0.80        | 0.36        | -0.64        | 0.52             | 0.40                    | 1.60        |
|                      | SCxSI                  | 0.91        | 0.38        | -0.25        | 0.81             | 0.43                    | 1.91        |
| <b>Hoverflies</b>    | Relative Flower Number | 0.90        | 0.34        | -0.32        | 0.75             | 0.46                    | 1.75        |
|                      | Relative Distance      | <b>0.06</b> | <b>0.43</b> | <b>-6.56</b> | <b>&lt;.001*</b> | <b>0.03</b>             | <b>0.14</b> |
|                      | SC-within              | 1.06        | 0.45        | 0.14         | 0.89             | 0.44                    | 2.55        |
|                      | SIxSI                  | 1.09        | 0.41        | 0.21         | 0.83             | 0.49                    | 2.44        |
|                      | SCxSC                  | 1.70        | 0.40        | 1.34         | 0.18             | 0.78                    | 3.71        |
|                      | SIxSC                  | 1.03        | 0.40        | 0.07         | 0.95             | 0.47                    | 2.27        |
|                      | SCxSI                  | 0.83        | 0.41        | -0.44        | 0.66             | 0.37                    | 1.86        |

645  
 646 \* indicate p-values <.05. The 95% confidence interval is the confidence interval of the odds  
 647 ratio. *Relative flower number* and *relative distance* were estimated relative to the other  
 648 individuals in the observation. These variables were transformed to range between 0 and 1.

649

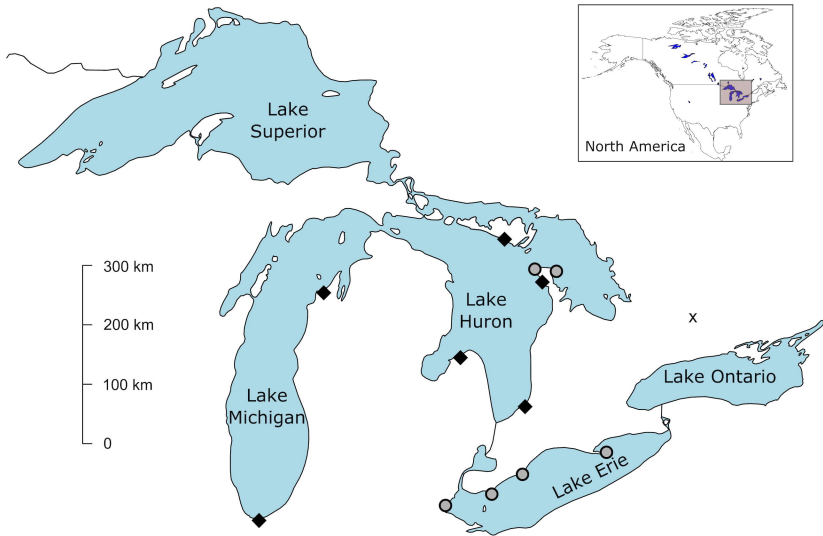

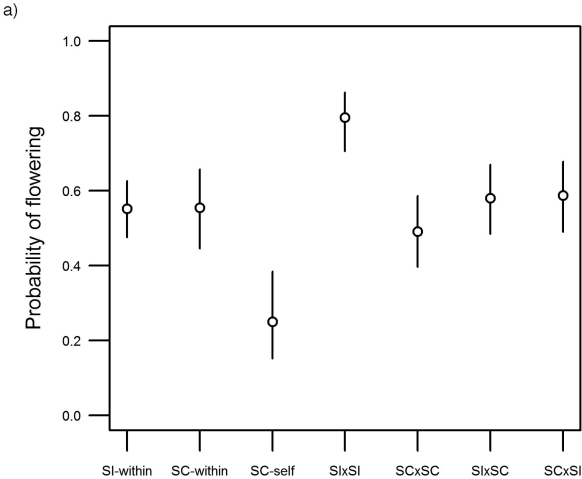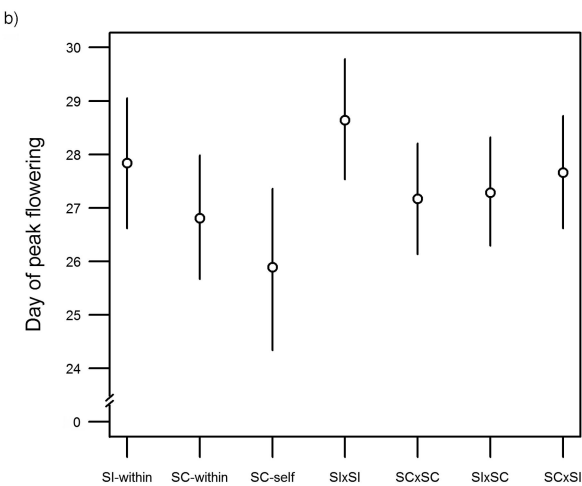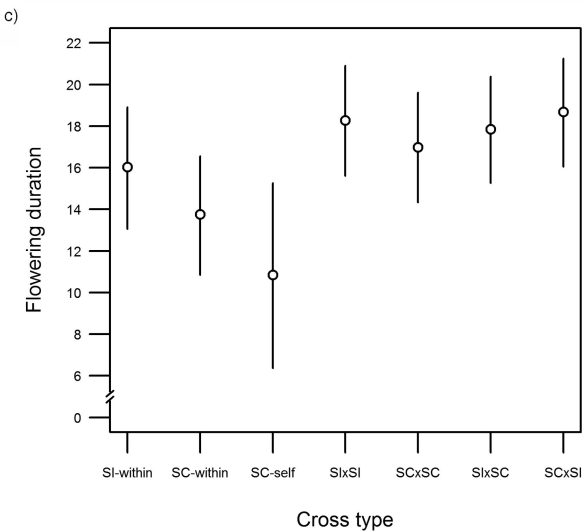



a)

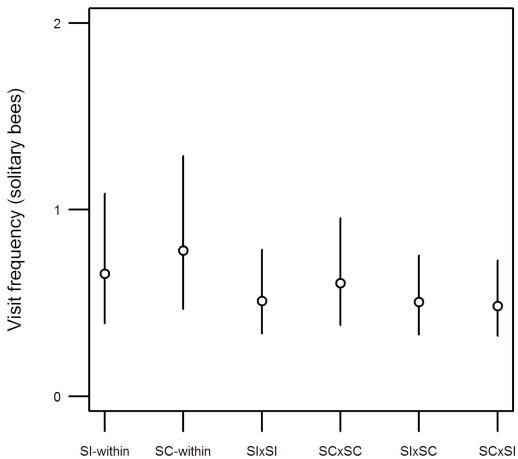

b)

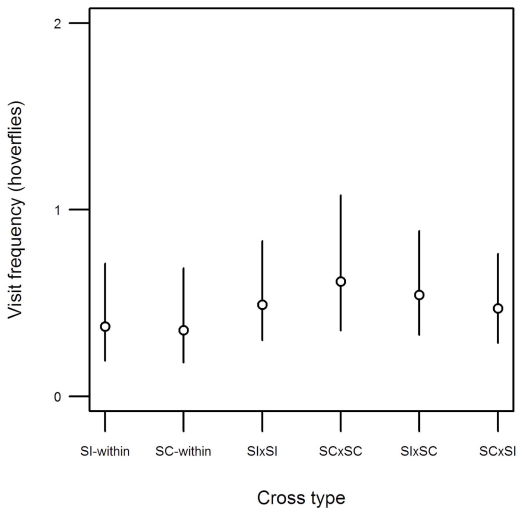

Probability of choice

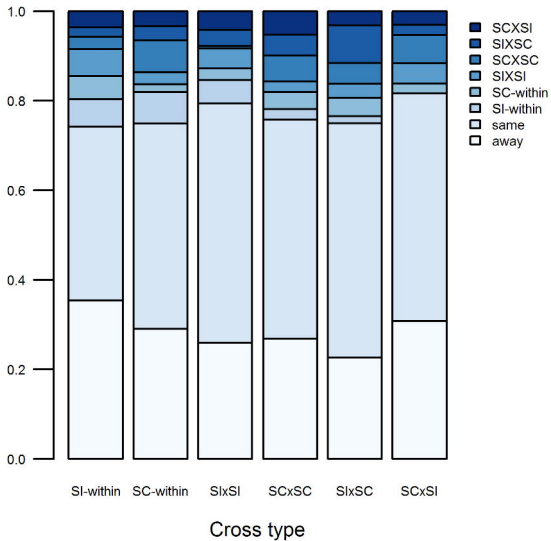

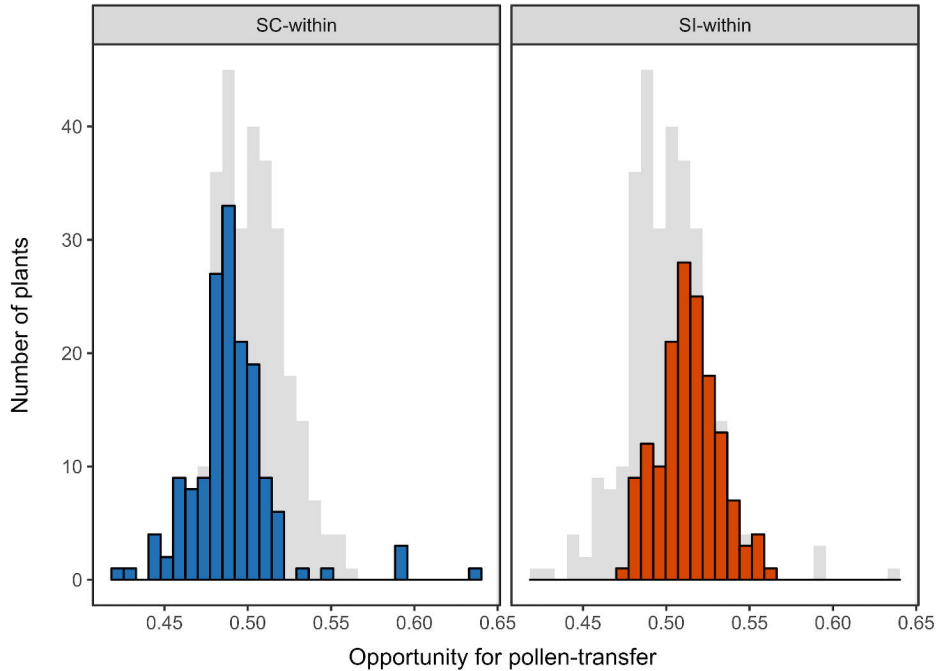

Source: https://www.biorxiv.org/content/10.1101/2019.12.17.879361v2.full.pdf
